# Supplementary material
Source: PubMed Central journal article supplement (PMC3517250)
Supplement: supp_tpc.112.101253_tpc101253supplemental.pdf [file supp_tpc.112.101253_tpc101253supplemental.pdf]

**Supplemental figure 1**

Local sequence alignment of *Arabidopsis* 20 MAPKs.

Alignment was performed using ClustalX. Homologous position of MPK6 Y144 residue is shown in orange. Homologous positions of MPK6 D218 and E222 residues are shown in blue. MPK6 sequence is in red.

Accession number for the sequences: At1g10210 (MPK1), At1g59580 (MPK2), At3g45640 (MPK3), At4g01370 (MPK4), At4g11330 (MPK5), At2g43790 (MPK6), At2g18170 (MPK7), At1g18150 (MPK8), At3g18040 (MPK9), At3g59790 (MPK10), At1g01560 (MPK11), At2g46070 (MPK12), At1g07880 (MPK13), At4g36450 (MPK14), At1g73670 (MPK15), At5g19010 (MPK16), At2g01450 (MPK17), At1g53510 (MPK18), At3g14720 (MPK19), and At2g42880 (MPK20).

|         |       |                                                                              |
|---------|-------|------------------------------------------------------------------------------|
| Group C | MPK1  | ...DYYLVYELMDTDLHQQIKSSQVL... ANCDLKICDFGLARASNT---KGQFMTEYVWTRWYRAPELLL...  |
|         | MPK2  | ...DYYLVYELMDTDLHQQIKSSQVL... ANCDLKICDFGLARTSNT---KGQFMTEYVWTRWYRAPELLL...  |
|         | MPK7  | ...DYYLVYELMDTDLHQQIKSSQSL... ANCDLKICDFGLARTSQG---NEQFMTEYVWTRWYRAPELLL...  |
|         | MPK14 | ...DYYLVYELMDSDLNQQIKSSQSL... ANCDLKICDFGLART-----YEQFMTEYVWTRWYRAPELLL...   |
| Group B | MPK4  | ...DYYIVYELMDTDLHQQIIRSNQPL... ANCDLKLGFGLARTKS----ETDFMTEYVWTRWYRAPELLL...  |
|         | MPK11 | ...DVHIVYELMDTDLHQQIIRSNQPL... ANCDLKIGDFGLARTKS----ETDFMTEYVWTRWYRAPELLL... |
|         | MPK12 | ...DYYIVYELMDTDLQRILRSNQTL... SKNELKIGDFGLARTTS----DTDFMTEYVWTRWYRAPELLL...  |
|         | MPK5  | -----MDTDLHQQIIRSNQSL... SNCDLKITDFGLARTTS----ETEYMTEYVWTRWYRAPELLL...       |
|         | MPK13 | ...DYYIVYELMDTDLHQQIIRSTQTL... TNCDLKICDFGLARTSN----ETEIMTEYVWTRWYRAPELLL... |
| Group A | MPK10 | ...DYYIVNELMEFDLYRTLKSDQEL... TQCDLKICDFGLARATP----ESNLMTEYVWTRWYRAPELLL...  |
|         | MPK3  | ...DYYISTELMDTDLHQQIIRSNQSL... ANCDLKICDFGLARPTS----ENDFMTEYVWTRWYRAPELLL... |
|         | MPK6  | ...DYYIAYELMDTDLHQQIIRSNQAL... ANCDLKICDFGLARVTS----ESDFMTEYVWTRWYRAPELLL... |
| Group D | MPK8  | ...DIYVVFELMESDLHQQVIKANDDL... ADCKLKICDFGLARVSFNDAPTAIFWTDYVATRWRAPELCG...  |
|         | MPK15 | ...DYYVVFELMESDLHQQVIKANDDL... ADCKLKICDFGLARVSFNDAPTAIFWTDYVATRWRAPELCG...  |
|         | MPK9  | ...DIYVVFELMESDLHQQVIKANDDL... SDCKLKICDFGLARVSFNDAPSAIFWTDYVATRWRAPELCG...  |
|         | MPK17 | ...DIYVVFELMESDLHVVLVKVNDDL... ADCKIKICDLGLARVSFTDPSAVFWTDYVATRWRAPELCG...   |
|         | MPK16 | ...DIYVVFELMESDLHQQVIKANDDL... ADCKLKICDFGLARVAFNDTPTAIFWTDYVATRWRAPELCG...  |
|         | MPK18 | ...DIYVVFELMESDLHQQVIKANDDL... ANCKLKVCFGLARVAFNDTPPTTVFWDYVATRWRAPELCG...   |
|         | MPK19 | ...DIYVVFELMESDLHQQVIKANDDL... ANCKLKVCFGLARVSFNDTPPTTVFWDYVATRWRAPELCG...   |
|         | MPK20 | ...DIYVVFELMESDLHQQVIKANDDL... ANCKLKICDFGLARVAFNDTPPTTVFWDYVATRWRAPELCG...  |
|         |       | *: ** : : : * :. :*: *:**** *:***.*****                                      |

**Supplemental figure 2**

Substrate preference of some MAPKs.

Phosphorylation of the semi-degenerated peptide array by MPK3<sup>WT</sup>, MPK3<sup>T129C</sup> and MPK4<sup>Y124C</sup>.

**A** MPK3<sup>wt</sup>

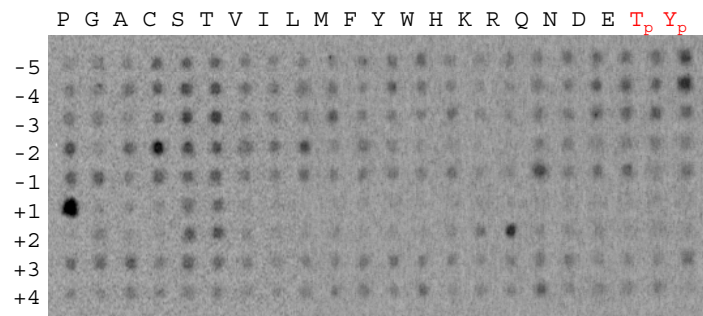

**B** MPK3<sup>T119C</sup>

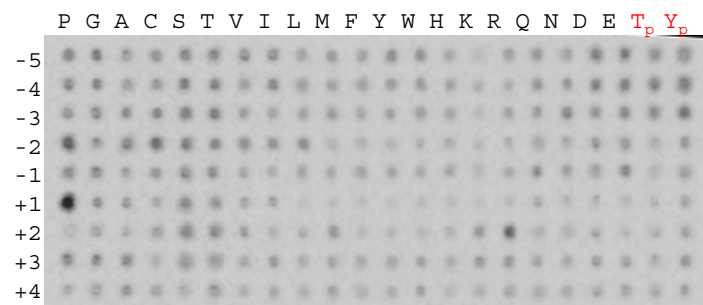

**C** MPK4<sup>Y124C</sup>

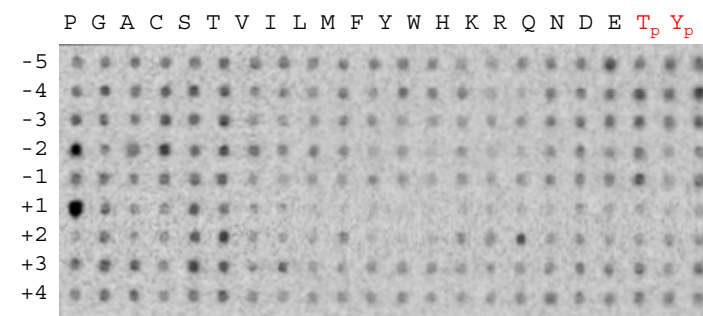

**Supplemental figure 3**

Stomatal closure induced by flg22 at indicated concentrations in Col-0, K4WT2 and K4DE2 lines. Data are mean $\pm$ SE of two independent experiments.

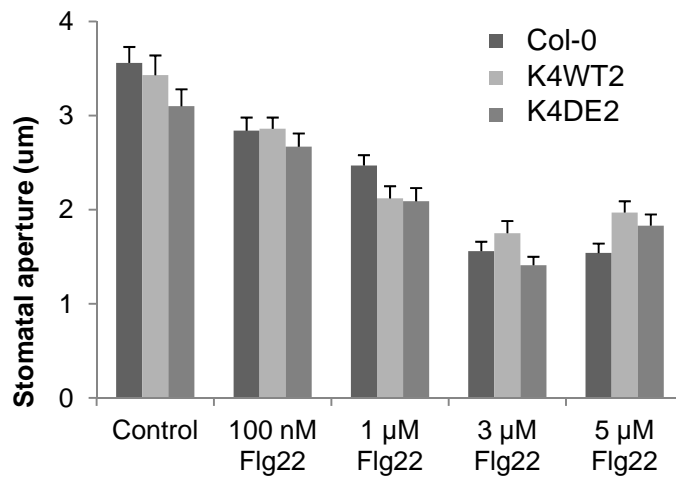

**Supplemental table 1**

List of MPK6 mutations identified in the yeast complementation screen.

| Clone number | Protein mutation                   |
|--------------|------------------------------------|
| 1            | G43R;K112M;Y144F;S217G             |
| 2            | Y144C;L387H;Q394L                  |
| 3            | Y144C                              |
| 4            | C78S;Y144C                         |
| 5            | D118N;Y144F;F219I                  |
| 6            | P68L;Y144C                         |
| 7            | P37L;Y144F;C360Y;H371Y             |
| 8            | A9V;D218G;E222A                    |
| 9            | R109C;L133I;Y144F;F364L            |
| 10           | F98L;R274H;P319H;F364I             |
| 11           | S5P;A136P;Y144C                    |
| 12           | D103Y;Y144C                        |
| 13           | K112R;Y144C                        |
| 14           | H42Q;D240N;R274H;L276H;C360R       |
| 15           | H116N;N237I;R274H                  |
| 16           | E34V;N138S;Y144F;V250L;F364L       |
| 17           | K112T;Y144F                        |
| 18           | D268E;R274H;N294K;T361I            |
| 19           | A97T;H116L;Y144C                   |
| 20           | E34V;D99A;Y144C;N349D;H371Q;I382S  |
| 21           | Y144C;I299M;S309P                  |
| 22           | I69L;R267Q;D268N;E287K;H318N;F366L |
| 23           | N54I;Y144F;C360Y                   |
| 24           | A25T;I47V;I51M;I111V;Y144F;H165Y   |
| 25           | F21Y;Y144F;K327R;P363S;F366I       |
| 26           | N96T;Y144C;F366S                   |
| 27           | C78S;Y144C                         |

**Supplemental table 2**

Pairs of primers used in this work.

| <b>Pairs of primers used for GateWay cloning.</b> |                                                                                                        |
|---------------------------------------------------|--------------------------------------------------------------------------------------------------------|
| Clone name                                        | Sequence of primer couple                                                                              |
| pDNR207-MPK3-END/STOP                             | GGA GAT AGA ACC ATG AAC ACC GGC GGT GGC<br>TCC ACC TCC GGA TCM ACC GTA TGT TGG ATT GAG TGC T           |
| pDNR207-MPK4-END/STOP                             | GGA GAT AGA ACC ATG TCG GCG GAG AGT TGT TTC<br>TCC ACC TCC GGA TCM CAC TGA GTC TTG AGG ATT GAA C       |
| pDNR207-MPK6-END/STOP                             | GGA GAT AGA ACC ATG GAC GGT GGT TCA GGT CA<br>TCC ACC TCC GGA TCM TTG CTG ATA TTC TGG ATT GAA AGC      |
| pDNR207-MPK7-END/STOP                             | GGA GAT AGA ACC ATG GCG ATG TTA GTT GAG CCA C<br>TCC ACC TCC GGA TCM GGC ATT TGA GAT TTC AGC TTC AG    |
| pDNR207-MKK1-END/STOP                             | GGA GAT AGA ACC ATG AAC AGA GGA AGC TTA TGC C<br>TCC ACC TCC GGA TCM CCA TTG CGA GAT GAA GGA GC        |
| pDNR207-MKK4-END/STOP                             | GGA GAT AGA ACC ATG AGA CCG ATT CAA TCG CCT C<br>TCC ACC TCC GGA TCM TGT GGT TGG AGA AGA CGA G         |
| pDNR207-ERF104-END/STP                            | GGA GAT AGA ACC ATG GCA ACT AAA CAA GAA GCT<br>TCC ACC TCC GGA TCM AGT GAC GGA GAT AAC GGA AAA         |
| pDNR207-VIP1-END/STOP                             | GGA GAT AGA ACC ATG GAA GGA GGA GGA AGA GGA<br>TCC ACC TCC GGA TCM GCC TCT CTT GGT GAA ATC CAT         |
| pDNR207-MKS1-END/STOP                             | GGA GAT AGA ACC ATG GAT CCG TCG GAG TAT TTT<br>TCC ACC TCC GGA TCM ATC TTG ATC CCA AAT ATG ACT AAA     |
| <b>Pairs of primers used for point mutations.</b> |                                                                                                        |
| Primer name                                       | Sequence of primer couple                                                                              |
| <i>MPK3</i> <sup>T119Y</sup>                      | F: ATC CAT CAA CTC ACA AAC AAT ATA TAC<br>R: GTA TAT ATT GTT TGT GAG TTG ATG GAT                       |
| <i>MPK3</i> <sup>D193G/E197A</sup>                | F: GAG AAT GGT TTT ATG ACT GCG TAT GT<br>R: ACA TAC GCA GTC ATA AAA CCA TTC TC                         |
| <i>MPK3</i> <sup>I119C</sup>                      | F: GTTTATATCTCTTGTGAATTAATGGAT<br>R: ATCCATTAATTCACAAGAGATATAAAC                                       |
| <i>MPK4</i> <sup>Y124C</sup>                      | F: GTC CAT AAG CTC ACA AAC AAT GTA AAC<br>R: GTT TAC ATT GTT TGT GAG CTT ATG GAC                       |
| <i>MPK4</i> <sup>D198G/E202A</sup>                | F: CGA GAC TGG CTT TAT GAC TGC ATA TGT TG<br>R: CAA CAT ATG CAG TCA TAA AGC CAG TCT CG                 |
| <i>MPK6</i> <sup>Y144C</sup>                      | F: GAT GTT TAC ATC GCG TAT GAG TTA ATG GAC AC<br>R: GTG TCC ATT AAC TCA TAC GCG ATG TAA ACA TC         |
| <i>MPK6</i> <sup>D218G</sup>                      | F: TTC TGA GAG TGG TTT CAT GAC TGA A<br>R: TTC AGT CAT GAA ACC ACT CTC AGA A                           |
| <i>MPK6</i> <sup>E222A</sup>                      | F: TTC ATG ACT GCA TAT GTT GTC ACG AGA<br>R: TCT CGT GAC AAC ATA TGC AGT CAT GAA                       |
| <i>MPK6</i> <sup>D218G/E222A</sup>                | F: GAG AGT GGT TTC ATG ACT GCA TAT GTT<br>R: AAC ATA TGC AGT CAT GAA ACC ACT CTC                       |
| <i>MPK7</i> <sup>Y114C</sup>                      | F: ATC CAT TAG CTC ACA AAC CAA ATA AAC<br>R: GTT TAT TTG GTT TGT GAG CTA ATG GAT                       |
| <i>MPK7</i> <sup>Q188G/E192A</sup>                | F: GGT AAT GGA CAG TTC ATG ACT GCG TAT GTG GTT<br>R: AAC CAC ATA CGC AGT CAT GAA CTG TCC ATT ACC       |
| <b>Other primers</b>                              |                                                                                                        |
| DR_F/DR_R                                         | TTT CTC TTT CTT TCC TAT AAC ACC AAT AG TG<br>GTG TCA ACA ACG TAT CTA CCA ACG ATT TGA CC                |
| PC2_F/PC2_R<br>(BglII underlined)                 | <u>AGA TCT</u> CCA GCT TTC TTG TAC AAA GTG GTG ATC<br><u>AGA TCT</u> TCA CTT CTC GAA CTG AGG ATG AGA C |
| GFP_S/GFP_R<br>(BamH1 underlined)                 | <u>GGA TCC</u> ATG GTA GAT CTG ACT AGT AAA GGA G<br><u>GGA TCC</u> TCA CAC GTG GTG GTG GTG GTG GCT AG  |

**Supplemental table 3**

Plasmids used in this study.

| <b>Name</b>      | <b>Description</b>                                | <b>Origin</b>                                                    |
|------------------|---------------------------------------------------|------------------------------------------------------------------|
| pDR195gtw        | Yeast strong expression vector                    | Oomen <i>et al.</i> , 2009. <i>New Phytol.</i> 181:637-50        |
| pDEST17          | Expression of His tagged protein in Coli          | Invitrogen                                                       |
| Peri-HIS-MBP     | Expression of Peri-His-MBP tagged protein in Coli | Nallamsetty <i>et al.</i> , 2005. <i>Protein Sci.</i> 14:2964-71 |
| pDEST22          | Yeast 2 hybrid vector                             | Invitrogen                                                       |
| pDEST32 modified | Yeast 2 hybrid vector                             | Modified from invitrogen to carry a Kanamycin Resistant gene     |

**Supplemental text 1**

DNA sequence of the PC2 Tag.

CCAGCTTTCTTGTACAAAGTGGTGATCATGGGTGAACAAAAGTTGATTTCTGAAGAAGATTT  
GAACGGTGAACAAAAGCTAATCTCCGAGGAAGACTTGAACGGTGAACAAAATTAATCTCA  
GAAGAAGACTTGAACGGATCCTCTAGAGGTGAACAAAAGTTGATTTCTGAAGAAGATTTGA  
ACGGTGAACAAAAGCTAATCTCCGAGGAAGACTTGAACGGTGAACAAAATTAATCTCAGA  
AGAAGACTTGAACGGATCCTCTAGAGGTGAACAAAAGTTGATTTCTGAAGAAGATTTGAAC  
GGTGAACAAAAGCTAATCTCCGAGGAAGACTTGAACGGTGAACAAAATTAATCTCAGAAG  
AAGACTTGAACGGATCCACTAGTGGATCCCCCGGGCTGCAGCCTAGGGATTACGATATCC  
CAACGACCGCCAGTCATCACCATCACCATCACCATCACTGGTCTCATCCTCAGTTCGAGAA  
GTGA
